# Supplementary material for: Vessel-derived angiocrine IGF1 promotes Meckel's cartilage proliferation to drive jaw growth during embryogenesis
Source: PubMed Central journal article supplement (PMC7295590; doi:10.1242/dev.190488), 2020-06-11
Supplement: develop-147-190488-s1.pdf [file develop-147-190488-s1.pdf]

## Supp Figure 1

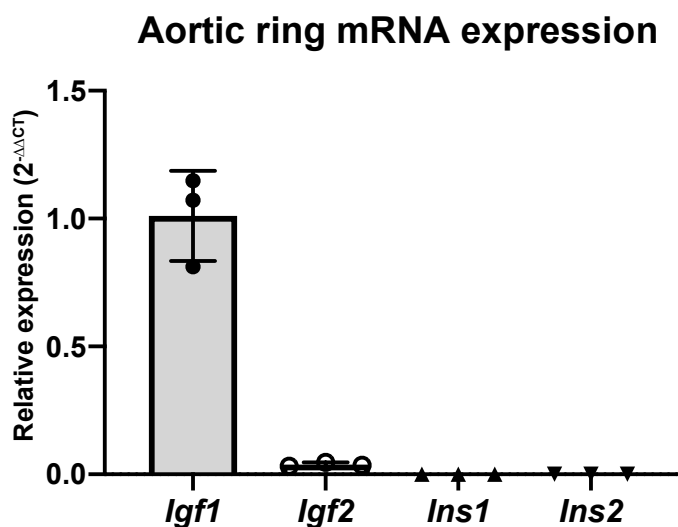

**Figure S1:**

mRNA expression of *Igf* and *Insulin* in aortic ring tissue.

Quantitative RT-PCR for *Igf1*, *Igf2*, *Ins1* and *Ins2* mRNA in aortic ring tissue. Graph represents relative concentrations of mRNAs calculated using the delta-delta CT method. mRNA levels for each gene were first normalised to *GAPDH* expression ( $\Delta CT$ ). Relative levels for each gene were then expressed relative to the level of *Igf1* ( $\Delta\Delta CT$ ). Fold change relative to *Igf1* was calculated with the equation  $2^{-\Delta\Delta CT}$ . Primer sets were independently validated in additional tissue samples (E14.5 whole embryo lysate) as a positive control.

## Supp Figure 2

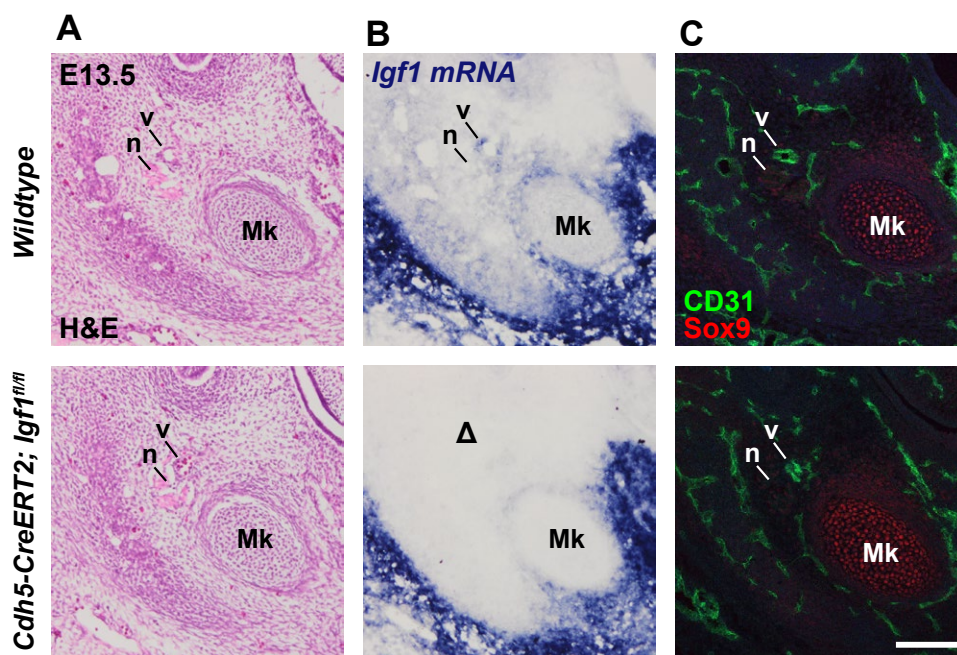

**Figure S2:**

*Igf1* expression is reduced in *Cdh5-CreERT2; Igf1<sup>fl/fl</sup>* embryos.

**A:** Frontal sections through the mandible of E13.5 wildtype and *Cdh5-CreERT2; Igf1<sup>fl/fl</sup>* embryos stained for Haematoxylin and Eosin. Mk, Meckel's cartilage; n, nerve; v, mandibular vessel. **B:** Serial section with *in situ* hybridisation for *Igf1* mRNA. *Igf1* is reduced in expression around the mandibular vessel region (Δ) of *Cdh5-CreERT2; Igf1<sup>fl/fl</sup>* embryos. **C:** Serial section immunostained for CD31 and Sox9. Scale bar = 100μm.

## Supp Figure 3

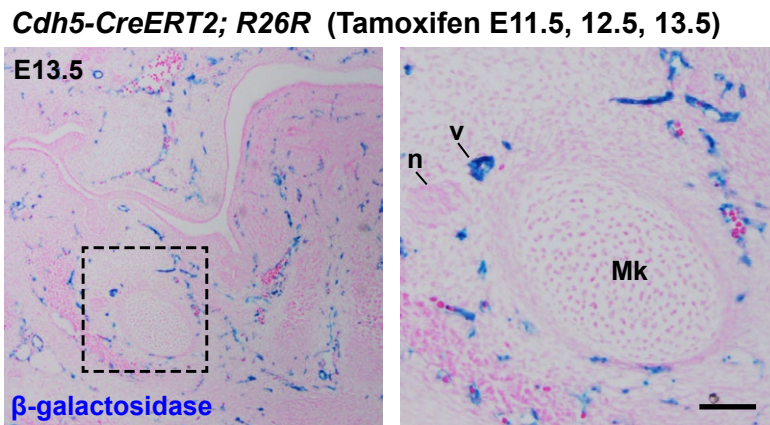

### Figure S3:

Tamoxifen injection induces genetic recombination in the mandibular blood vasculature. Frontal section through the mandible of E13.5 *Cdh5-CreERT2; R26R* embryo, with tamoxifen injection at E11.5, E12.5 and E13.5 to induce *LacZ* reporter gene recombination. Tissue section has been stained with X-gal to show areas of  $\beta$ -galactosidase activity.  $\beta$ -galactosidase reporter gene expression is restricted to the vasculature, including the mandibular vessel (v). Mk, Meckel's cartilage; n, nerve. Scale bar = 50 $\mu$ m.
